# Supplementary material for: SARS‐CoV‐2 N Protein Induces Acute Kidney Injury via Smad3‐Dependent G1 Cell Cycle Arrest Mechanism
Source: PubMed Central journal article supplement (PMC8787402; doi:10.1002/advs.202103248), 2021-11-23
Supplement: ADVS-9-2103248-s001.pdf [file ADVS-9-2103248-s001.pdf]

## Supporting Information

for *Adv. Sci.*, DOI: 10.1002/advs.202103248

SARS-CoV-2 N protein induces acute kidney injury via  
Smad3-dependent G1 cell cycle arrest mechanism

*Wenbiao Wang*<sup>1,2,4,6,#</sup>, *Junzhe Chen*<sup>1,3,#</sup>, *Dingwen Hu*<sup>5</sup>, *Pan Pan*<sup>2</sup>,  
*Liyang Liang*<sup>1</sup>, *Wenjing Wu*<sup>1,4</sup>, *Ying Tang*<sup>3</sup>, *Xiao R Huang*<sup>1,4</sup>,  
*Xueqing Yu*<sup>4,\*\*</sup>, *Jianguo Wu*<sup>2,5,\*\*</sup>, *Hui Y Lan*<sup>1,6,\*</sup>

## **Supplementary Information**

### **SARS-CoV-2 N protein induces acute kidney injury via Smad3-dependent G1 cell cycle arrest mechanism**

Wenbiao Wang<sup>1,2,4,6,#</sup>, Junzhe Chen<sup>1,3,#</sup>, Dingwen Hu<sup>5</sup>, Pan Pan<sup>2</sup>, Liying Liang<sup>1</sup>, Wenjing Wu<sup>1,4</sup>, Ying Tang<sup>3</sup>, Xiao R. Huang<sup>1,4</sup>, Xueqing Yu<sup>4,\*\*</sup>, Jianguo Wu<sup>2,5,\*\*</sup>, Hui Y. Lan<sup>1,6\*</sup>.

<sup>1</sup> Departments of Medicine & Therapeutics, Li Ka Shing Institute of Health Sciences, and Lui Che Woo Institute of Innovative Medicine, The Chinese University of Hong Kong, Hong Kong, China.

<sup>2</sup> Guangdong Provincial Key Laboratory of Virology, Institute of Medical Microbiology, Jinan University, Guangzhou 510632, China.

<sup>3</sup> Department of Nephrology, The Third Affiliated hospital, Southern Medical University, Guangzhou, China.

<sup>4</sup> Guangdong-Hong Kong Joint Laboratory for Immunological and Genetic Kidney Disease, Guangdong Academy of Medical Science, Guangdong Provincial People's Hospital, Guangzhou, China.

<sup>5</sup> State Key Laboratory of Virology, College of Life Sciences, Wuhan University, Wuhan 430072, China.

<sup>6</sup> The Chinese University of Hong Kong-Guangdong Academy of Sciences/Guangdong Provincial People's Hospital Joint Research Laboratory on Immunological and Genetic Kidney Diseases, The Chinese University of Hong Kong, Hong Kong, China.

#Wenbiao Wang, Junzhe Chen contributed equally to this study

\***Correspondence:** Hui-Yao Lan, Departments of Medicine & Therapeutics, Li Ka Shing Institute of Health Sciences, The Chinese University of Hong Kong, Hong Kong, China. E-mail: [hylan@cuhk.edu.hk](mailto:hylan@cuhk.edu.hk).

\*\***Co-correspondence:** Jianguo Wu, [jwu898@jnu.edu.cn](mailto:jwu898@jnu.edu.cn); Xueqing Yu, [yuxq@mail.sysu.edu.cn](mailto:yuxq@mail.sysu.edu.cn)

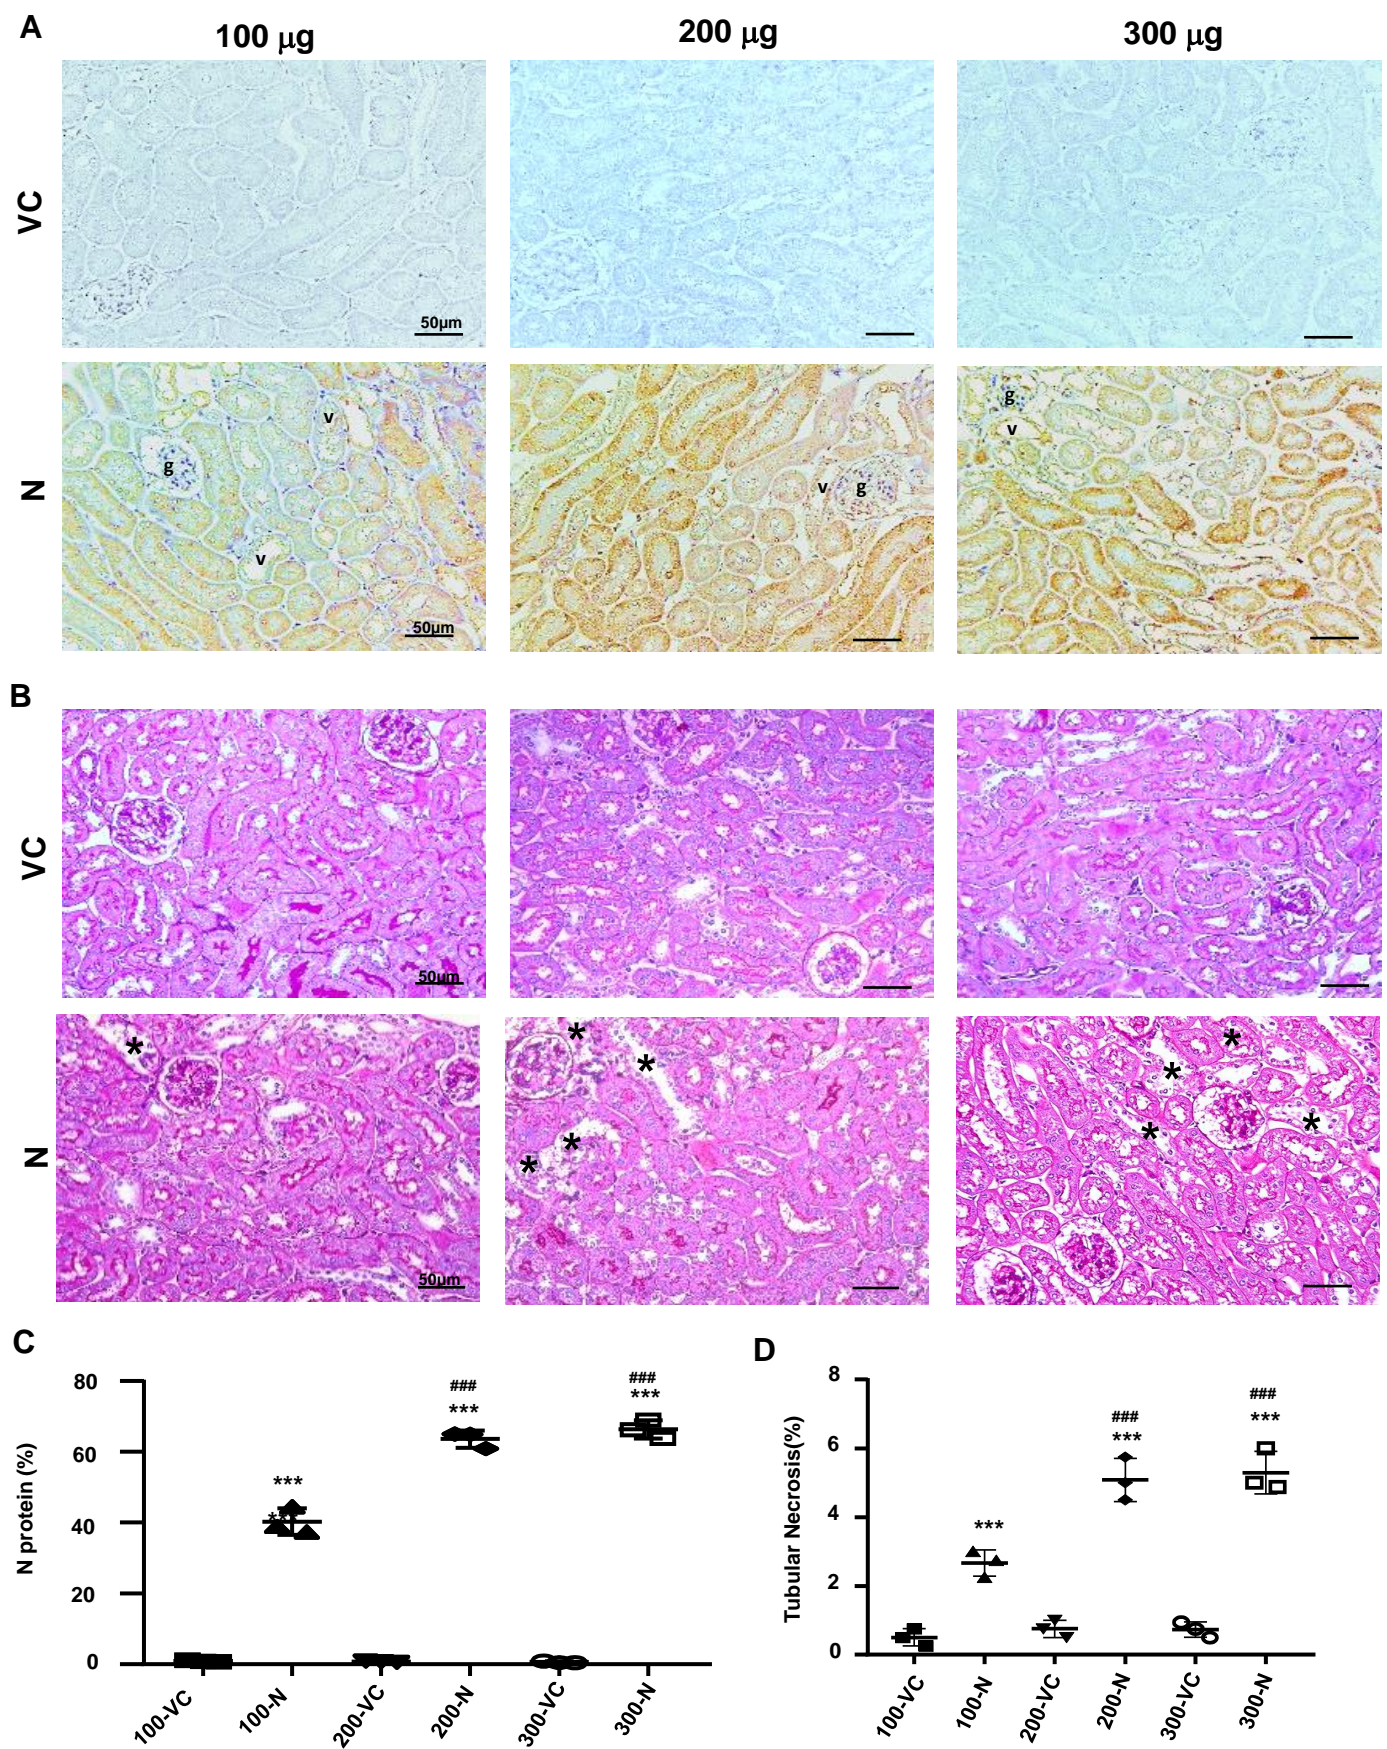

**Figure S1. Ultrasound-microbubble-mediated kidney-specific SARS-CoV-2 N protein (N) expression induces tubular necrosis in a dose-dependent manner. (A) N protein immunostaining; (B) PAS-staining; (C) Semi-quantitative analysis of N protein; (D) Semi-quantitative analysis of tubular necrosis (\*). Note that SARS-CoV-2 N protein plasmid transfer results in overexpression of N protein and tubular necrosis in a dose-dependent manner, peaking at 200  $\mu\text{g}/\text{mouse}$ . Each dot represents one mouse and data are expressed as the mean  $\pm$  SEM for groups of 3 mice. \*\*\* $p < 0.001$  versus vector control (VC); #### $p < 0.001$  versus SARS-CoV-2 N-expressing plasmid at 100  $\mu\text{g}/\text{mouse}$  (100-N). g, glomerulus; v, vascular cells. Scale bar=50  $\mu\text{m}$ .**



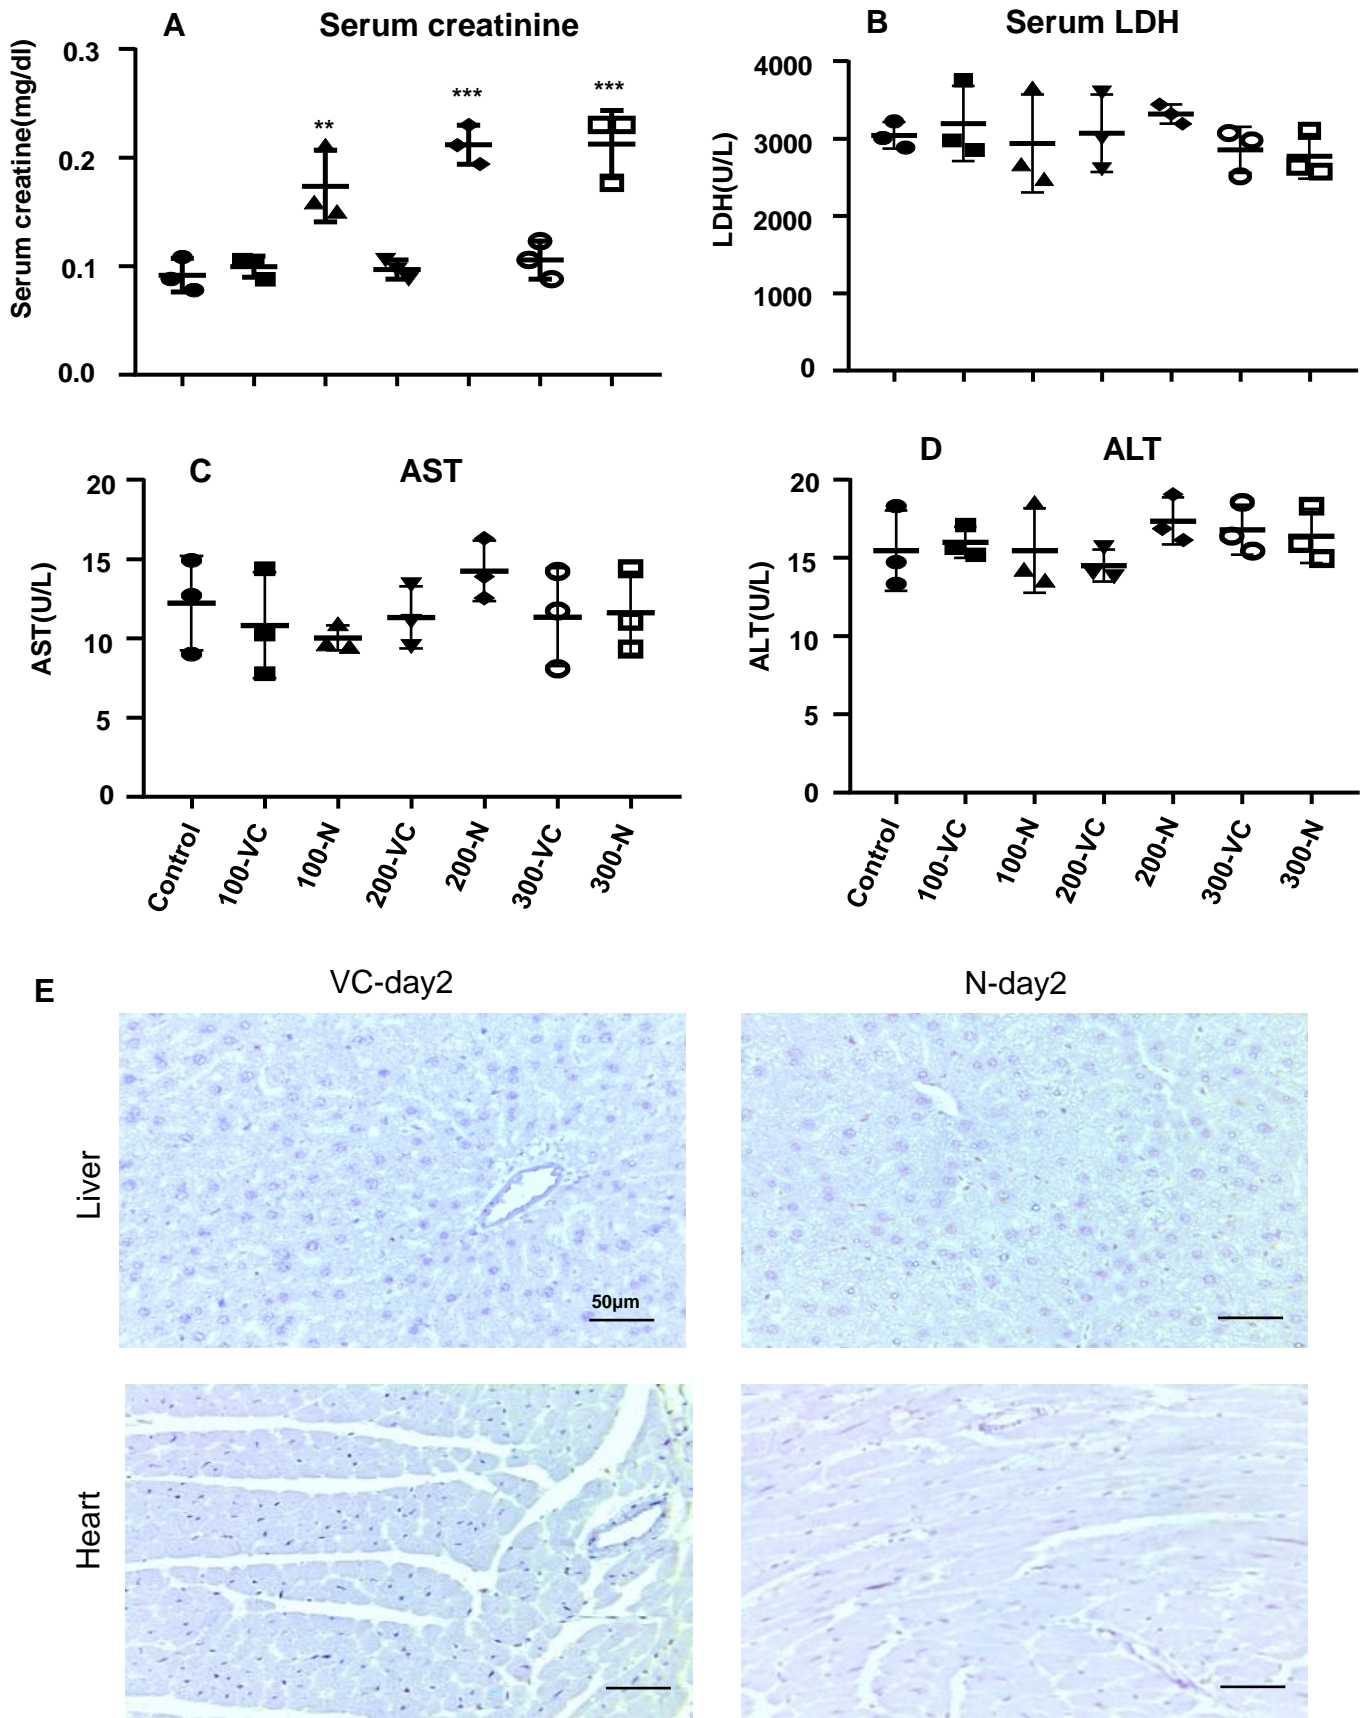

**Figure S2. Ultrasound-microbubble-mediated kidney-specifically SARS-CoV-2 N protein (N) expression results in a significant increase in serum creatine in a dose-dependent manner without systemic toxicity. (A) Serum creatinine; (B) serum LDH; (C) AST; (D) ALT; (E) immunohistochemical staining shows that expression of SARS-CoV-2 N protein is not detectable in both liver and heart tissues after ultrasound-microbubble-mediated kidney-specifically SARS-CoV-2 N transfection. Each dot represents one mouse and data are expressed as the mean  $\pm$  SEM for groups of 3 mice. \*\* $p < 0.01$ , \*\*\* $p < 0.001$  versus vector control (VC).**



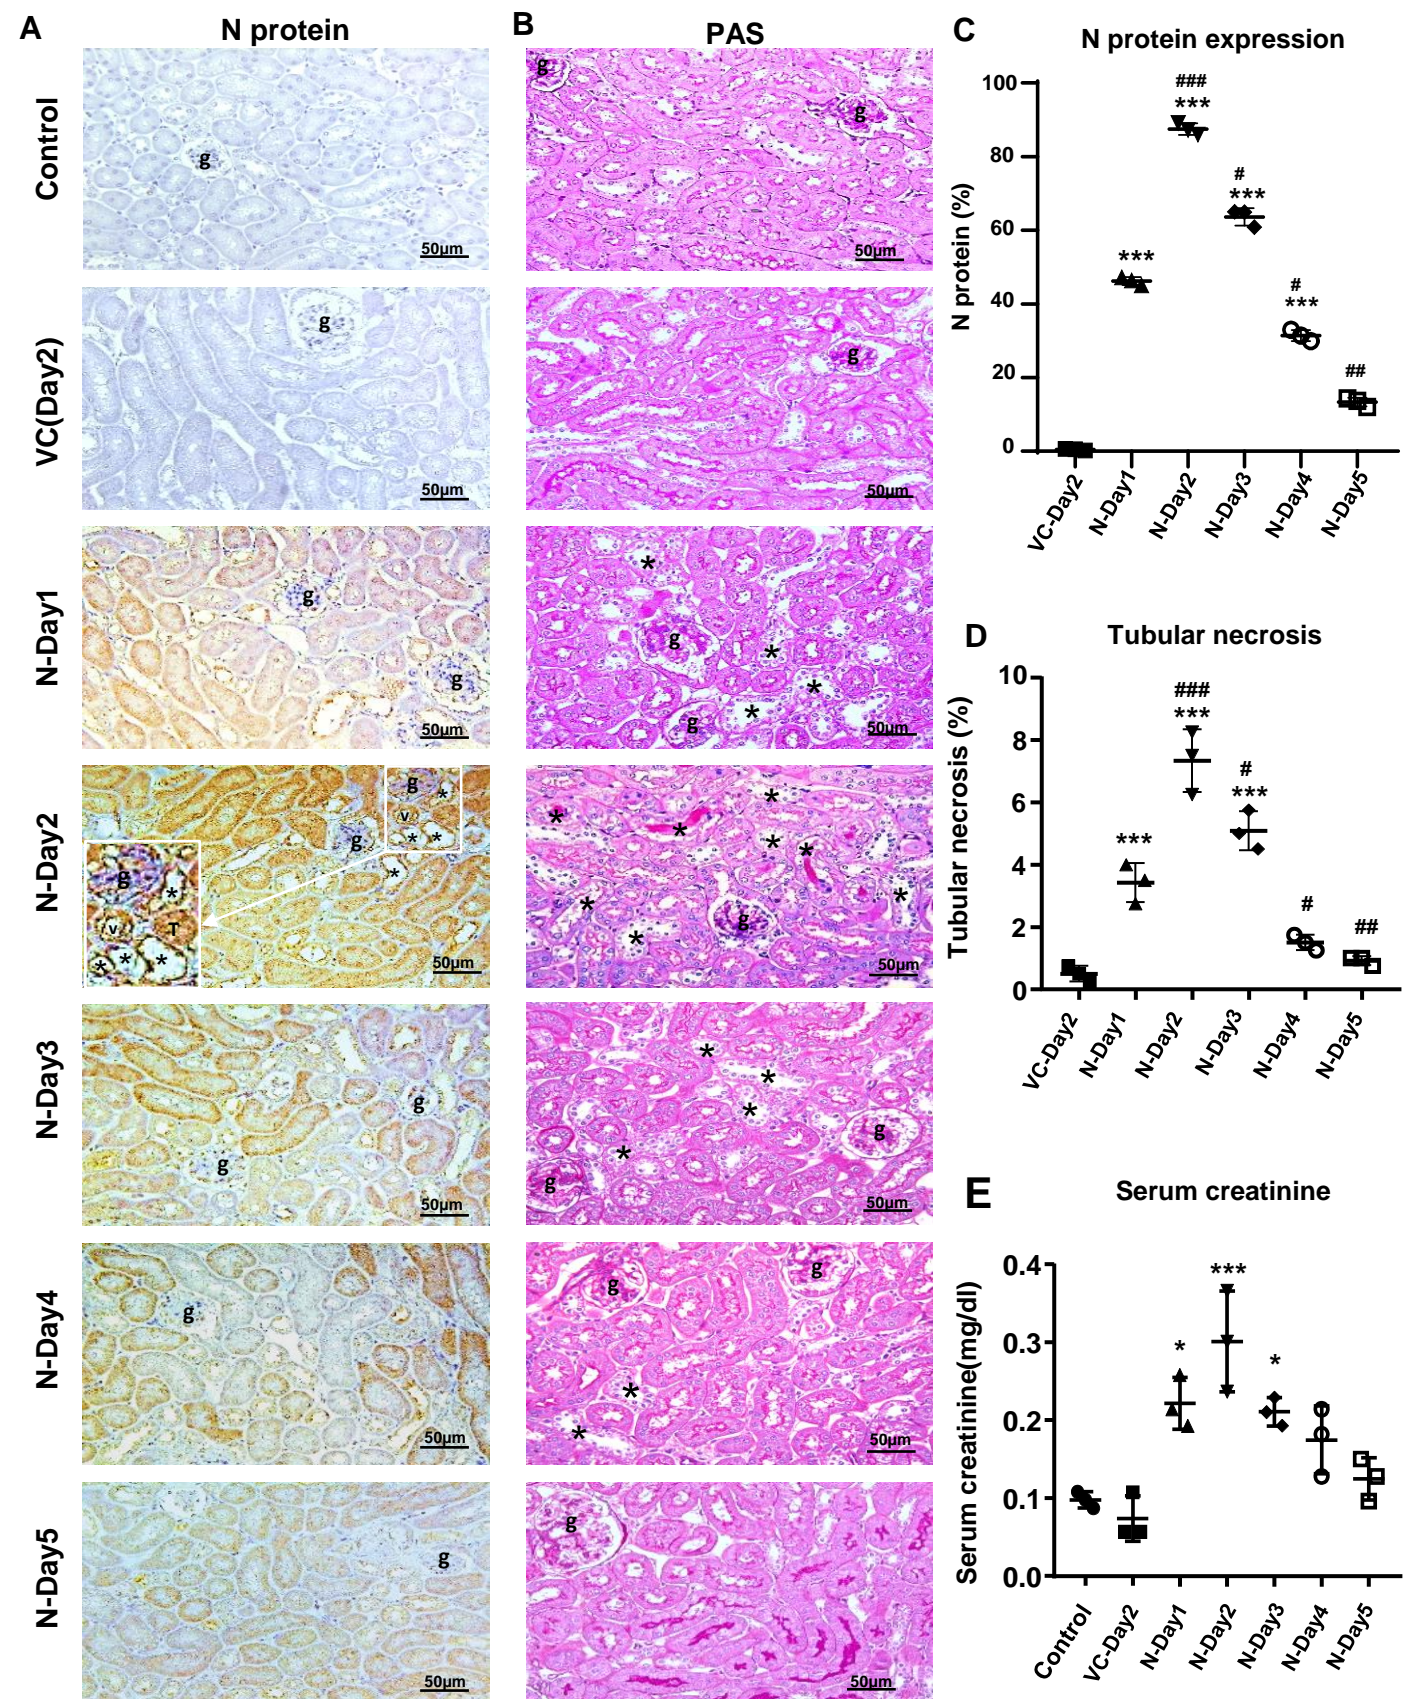

**Figure S3. Kidney-specifically overexpressing SARS-CoV-2 N protein (N) causes AKI in a time-dependent manner, peaking at day 2 after the N gene transfer. (A) N protein immunostaining; (B) PAS-staining; (C) Semi-quantitative analysis of N protein; (D) Semi-quantitative analysis of tubular necrosis (\*); (E) Serum levels of creatinine. Note that kidney-specifically SARS-CoV-2 N-expressing plasmid transfer results in overexpression of N protein primarily in tubular cells with tubular necrosis (\*) as well as in glomerular (g) and vascular (v) cells (see inserted picture at day 2) in a time-dependent manner, peaking at day 2. Each dot represents one mouse and data are expressed as the mean ± SEM for groups of 3 mice. \*p<0.05, \*\*\*p<0.001 versus vector control (VC); #p<0.05, ##p<0.01, ###p<0.001 versus SARS-CoV-2 N-expressing plasmid at day 1 (N-day 1). g, glomerulus. Scale bar=50 μm.**

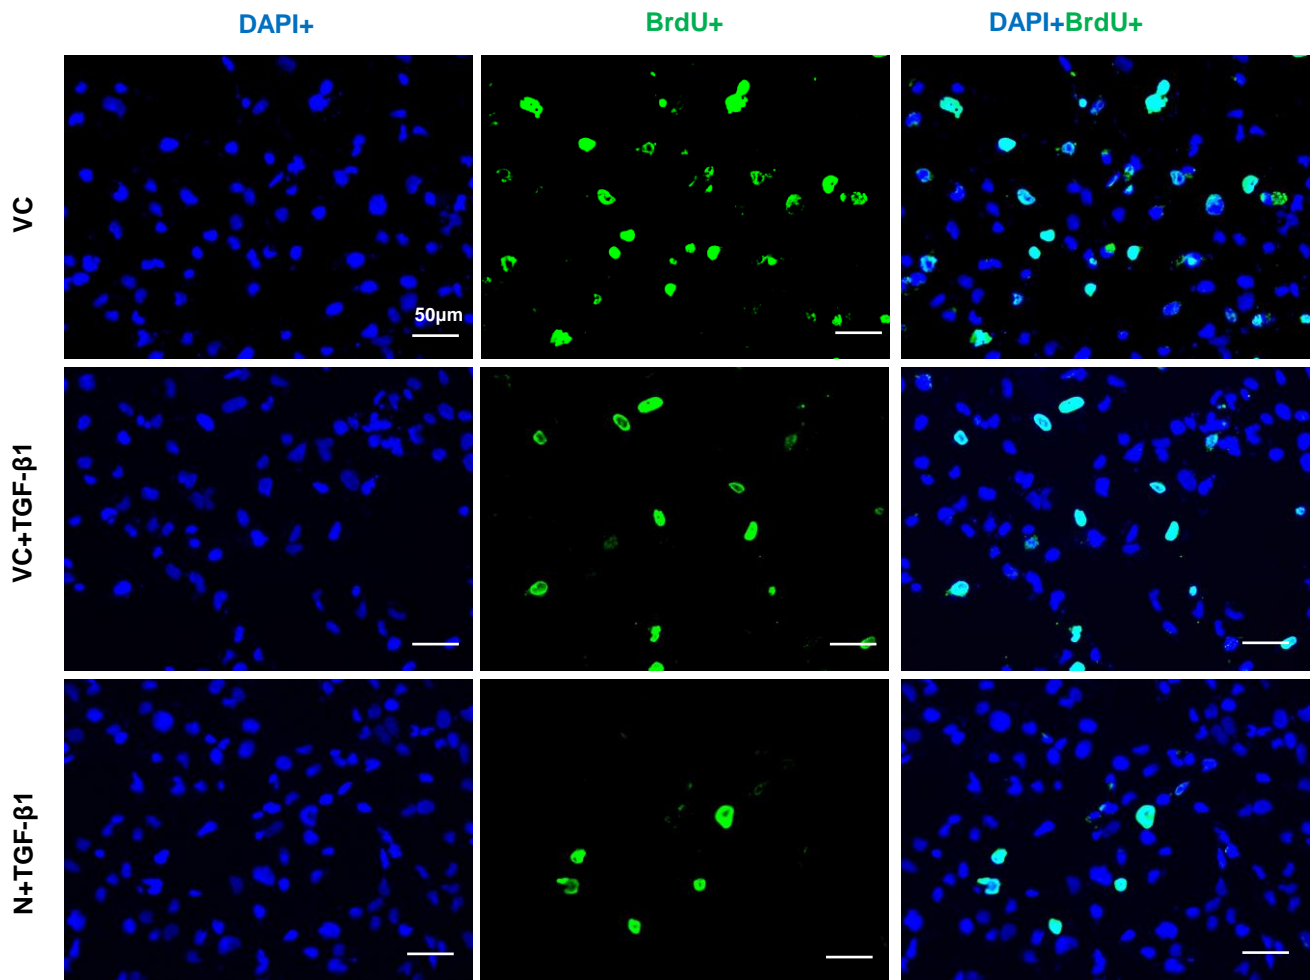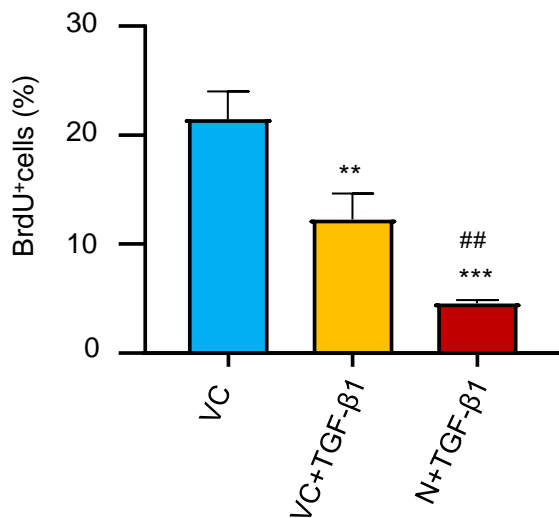

**Figure S4. Immunofluorescence detects that overexpressing SARS-CoV-2 N protein (N) largely promotes TGF-β1-induced inhibition of S-phase cell cycle in human TECs (HK-2) in vitro.** Note that under normal conditions, HK-2 cells are highly proliferative as demonstrated by many cells entering into the S-phase of cell cycle, which is inhibited by addition of TGF-β1 (5ng/ml) and becomes worsen by co-overexpressing SARS-CoV-2 N protein. Each bar represents the mean  $\pm$  SEM for 3 independent experiments. \*\* $p < 0.01$ , \*\*\* $p < 0.001$  versus vector control (VC); ###  $p < 0.001$  versus VC + TGF-β1. Scale bar=50  $\mu$ m.



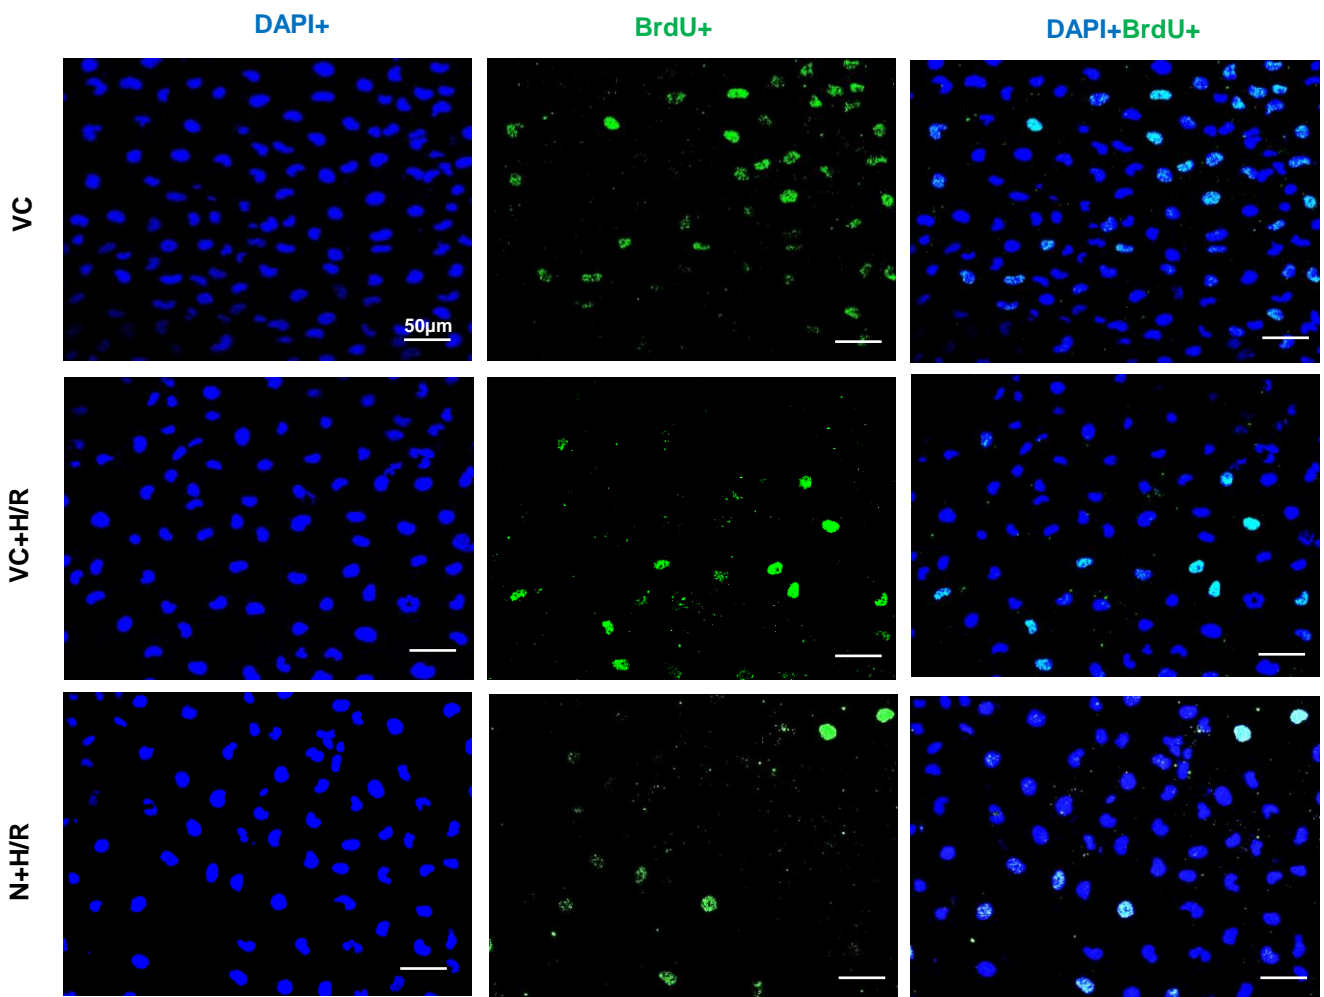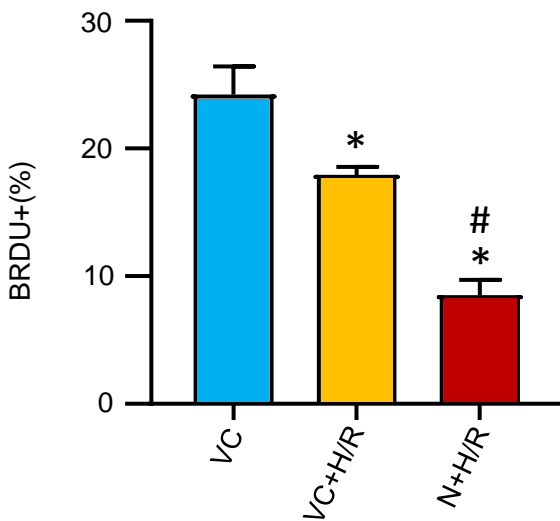

**Figure S5. Immunofluorescence detects that overexpressing SARS-CoV-2 N protein (N) largely promotes hypoxia/reoxygenation-induced inhibition of S-phase cell cycle in human TECs (HK-2) in vitro.**

Note that under normal conditions, HK-2 cells are highly proliferative as demonstrated by many cells entering into the S-phase of cell cycle, which is inhibited by hypoxia/reoxygenation injury and becomes worsen by overexpressing SARS-CoV-2 N protein. Each bar represents the mean  $\pm$  SEM for 3 independent experiments. \* $p < 0.05$  versus vector control (VC); #  $p < 0.005$  versus VC +H/R. Scale bar=50  $\mu$  m.

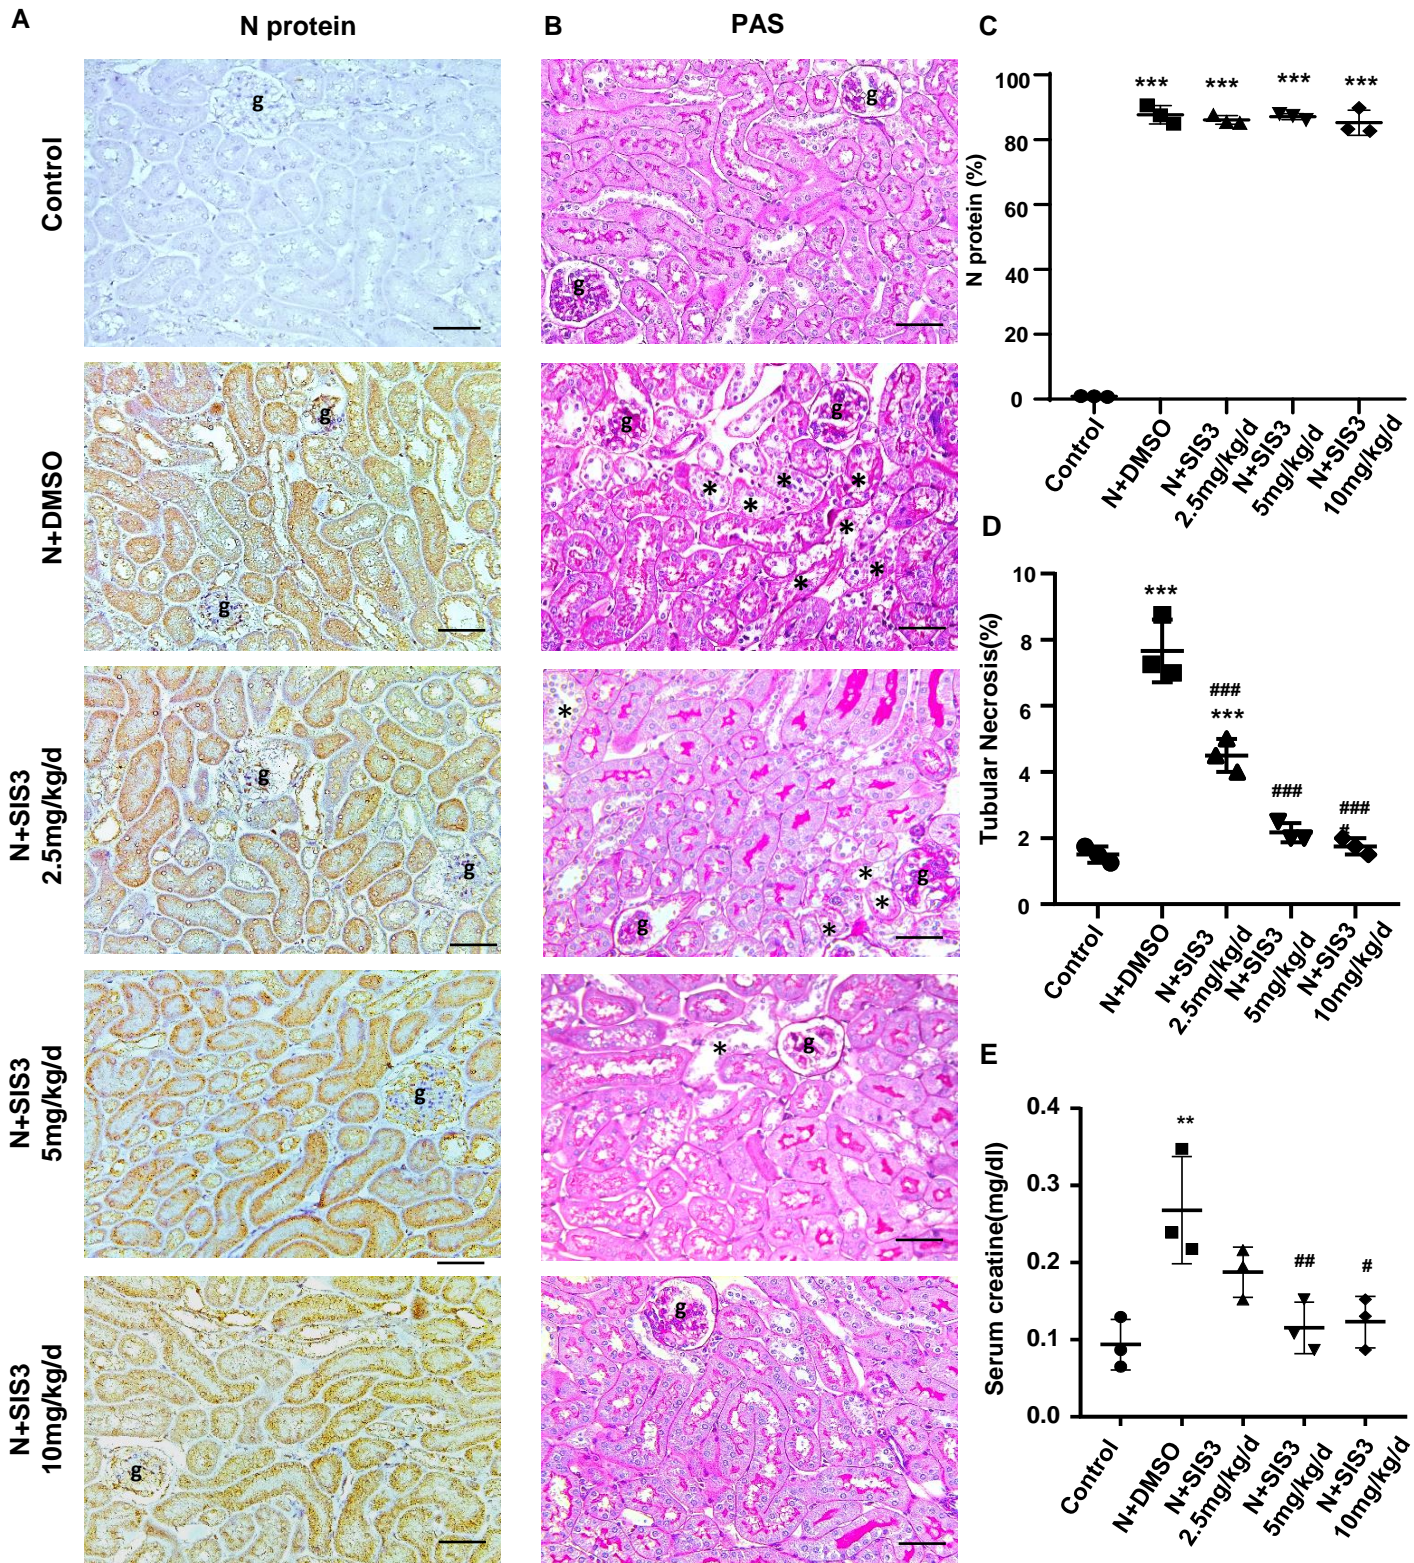

**Figure S6. Treatment with SIS3 dose-dependently inhibits SARS-CoV-2 N protein-induced AKI without altering expression of N protein in the kidneys. (A)** SARS-CoV-2 N protein immunostaining; **(B)** PAS-staining for detection of tubular necrosis (\*); **(C)** Semi-quantitation of the N protein expression in the kidney; **(D)** Semi-quantitation of renal tubular necrosis; **(E)** Serum levels of creatinine. Each dot represents one mouse and data are expressed as the mean  $\pm$  SEM for groups of 3 mice. \*\* $p < 0.01$ , \*\*\* $p < 0.001$  versus vector control; # $p < 0.05$ , ## $p < 0.01$ , ### $p < 0.001$  versus overexpression of SARS-CoV-2 N + DMSO-control treatment (N+DMSO). g, glomerulus. Scale bar=50  $\mu$ m.



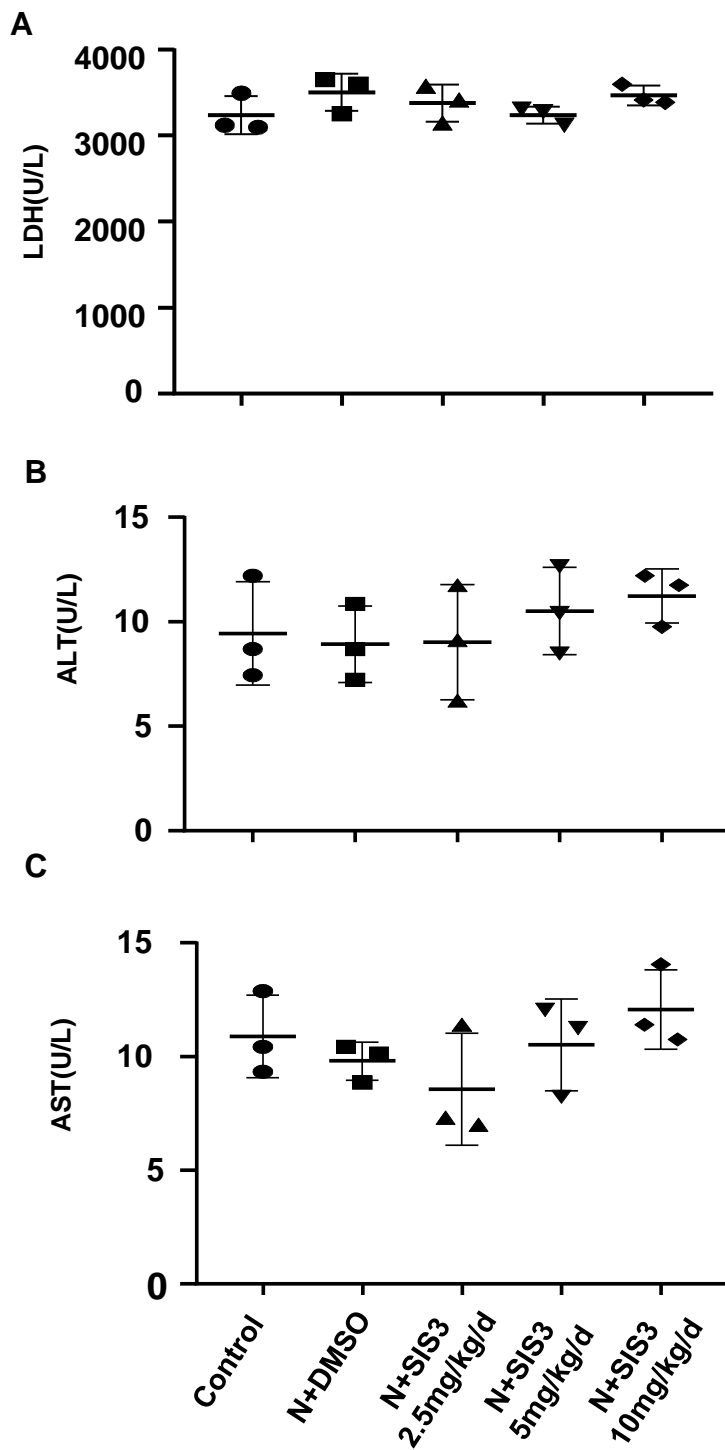

**Figure S7. Systemic toxicity of SIS3 in mice with SARS-CoV-2 N protein-induced AKI. (A)** Serum levels of LDH release; **(B)** Serum levels of ALT; **(C)** Serum levels of AST. Each dot represents one mouse and data are expressed as the mean  $\pm$  SEM for groups of 3 mice.

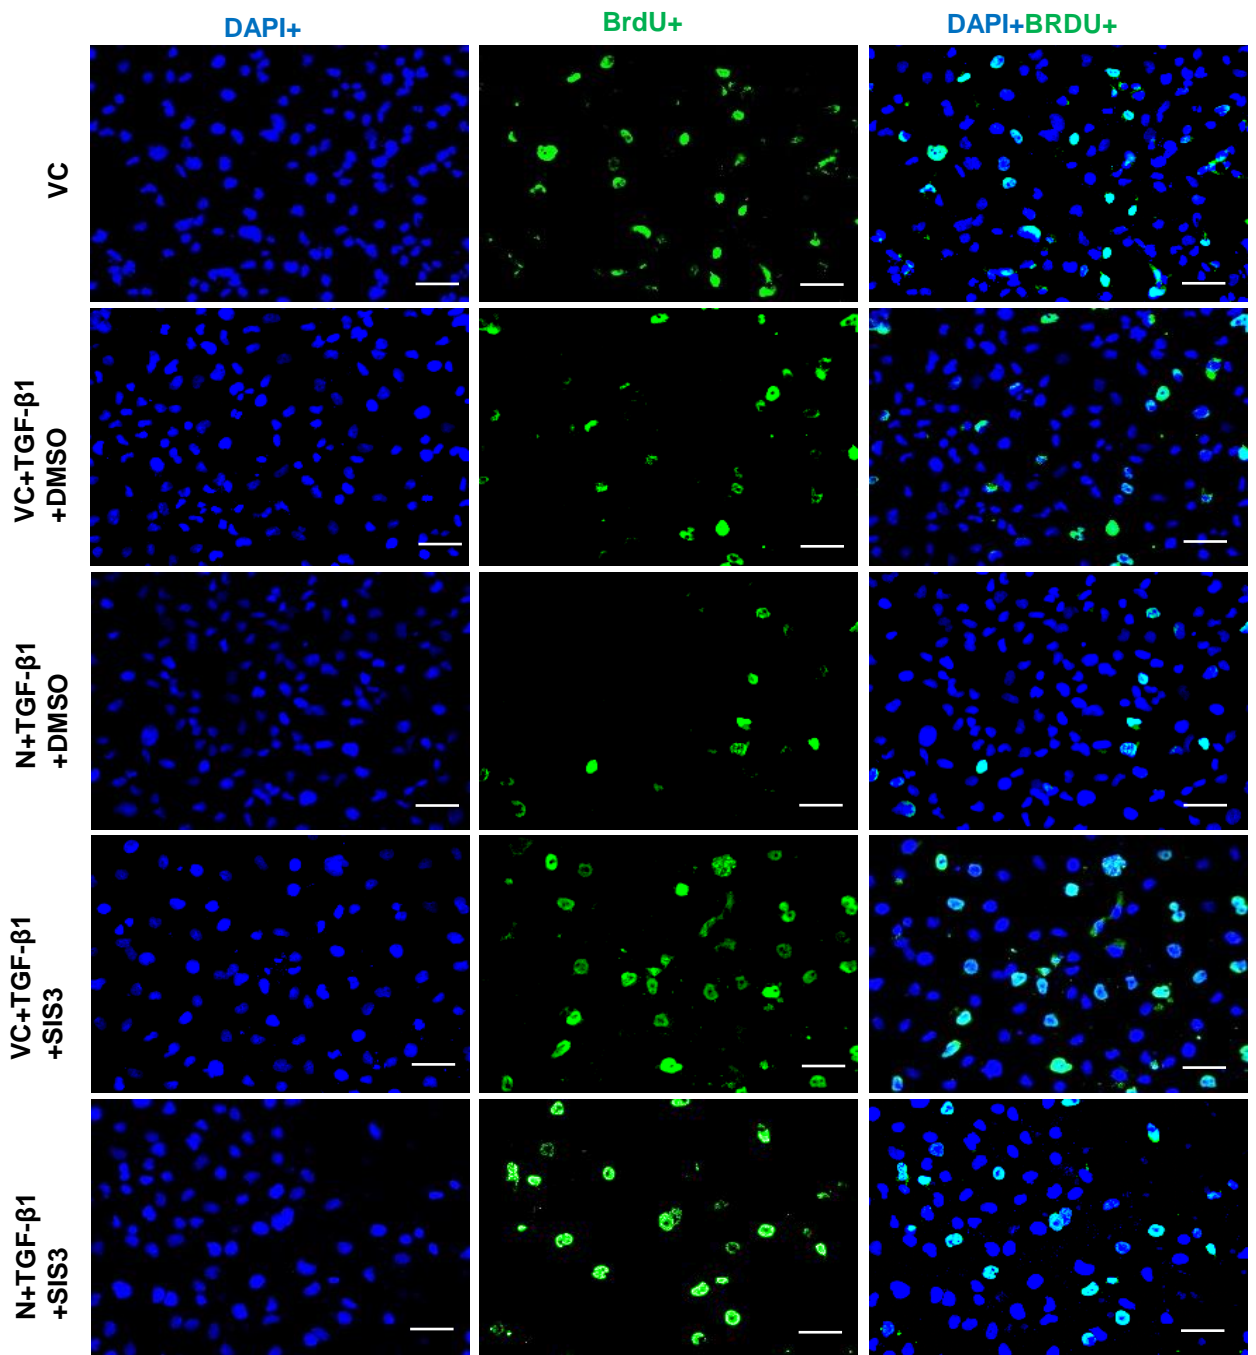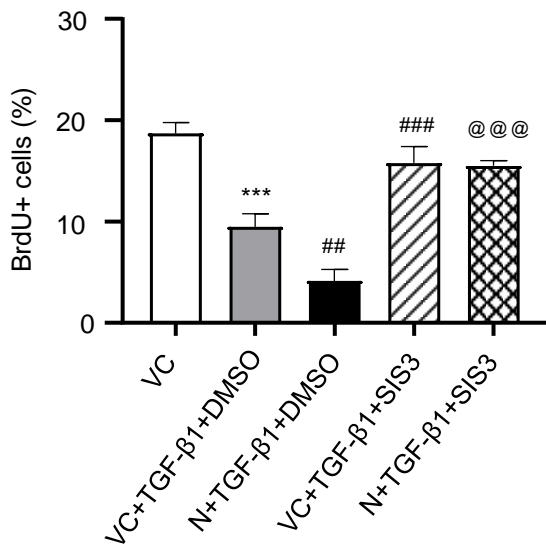

**Figure S8. Blockade of Smad3 reverses SARS-CoV-2 N-induced inhibition of cell cycle progression at the S-phase in HK-2 cells in vitro.** Immunofluorescence detects that overexpression of SARS-CoV-2 N protein (N) can severely impair TEC proliferation by blocking the S-phase cell cycle progression, which is virtually blocked with a Smad3 inhibitor SIS3. Note that SIS3 treatment also blocks TGF-β1-induced inhibition of S-phase cell cycle in HK-2 cells. Each bar represents the mean  $\pm$  SEM for groups of 3 independent experiments. \* $p < 0.05$ , \*\*\* $p < 0.001$  versus vector control (VC); ## $p < 0.01$ , ### $p < 0.001$  versus VC+TGF-β1+DMSO; @@@  $p < 0.001$  versus N+TGF-β1+DMSO. Scale bar=50  $\mu$ m.
